# Supplementary material
Source: PubMed Central journal article supplement (PMC3204026)

NeuN

ThS

OC

Merge

Tg

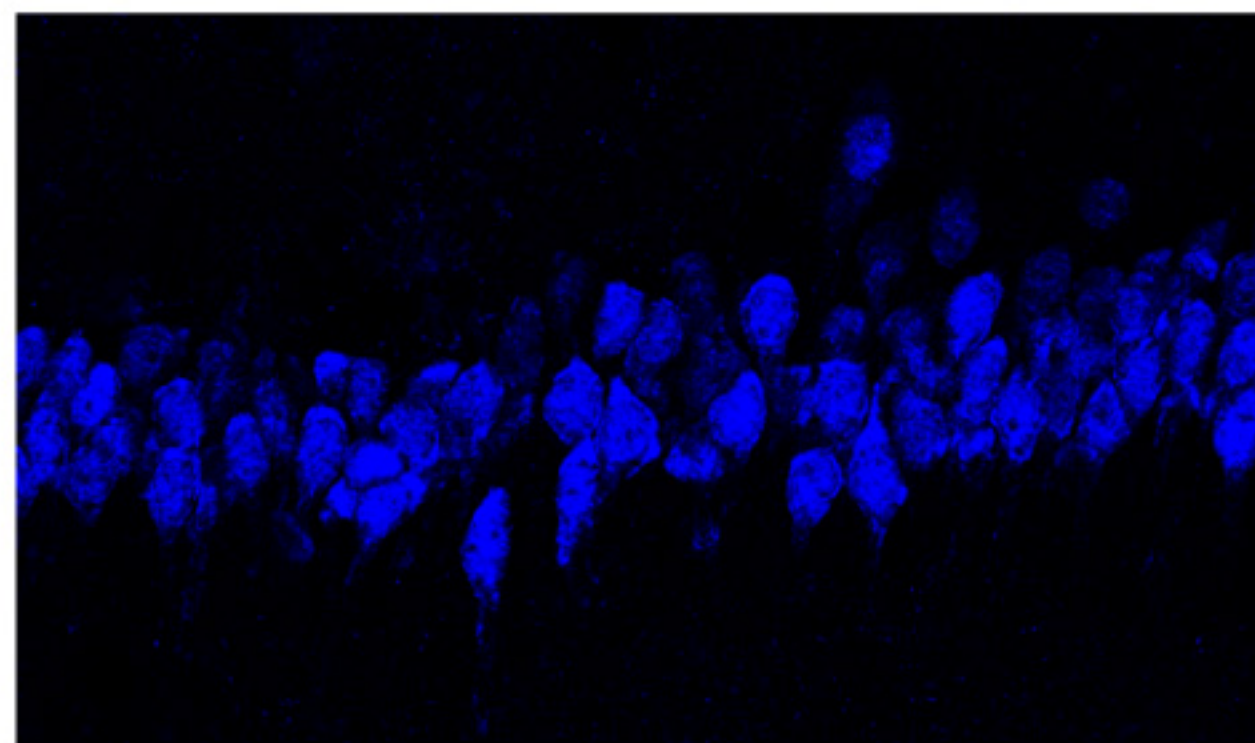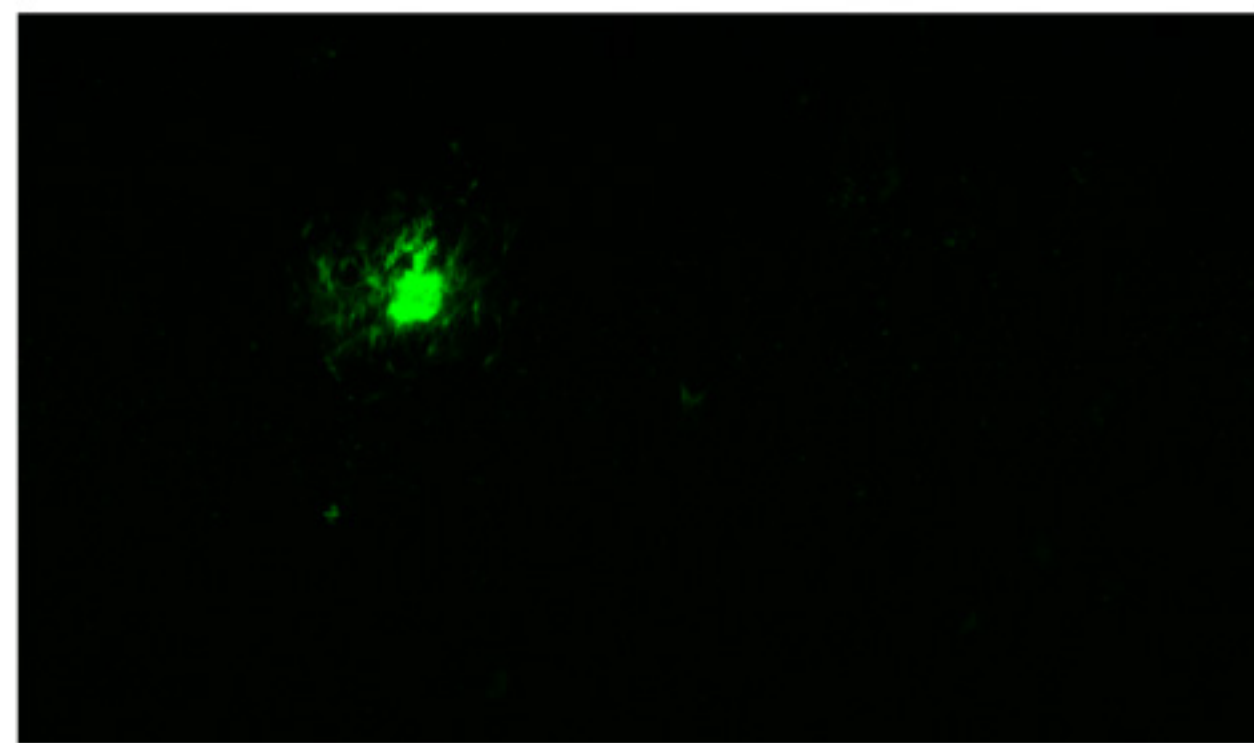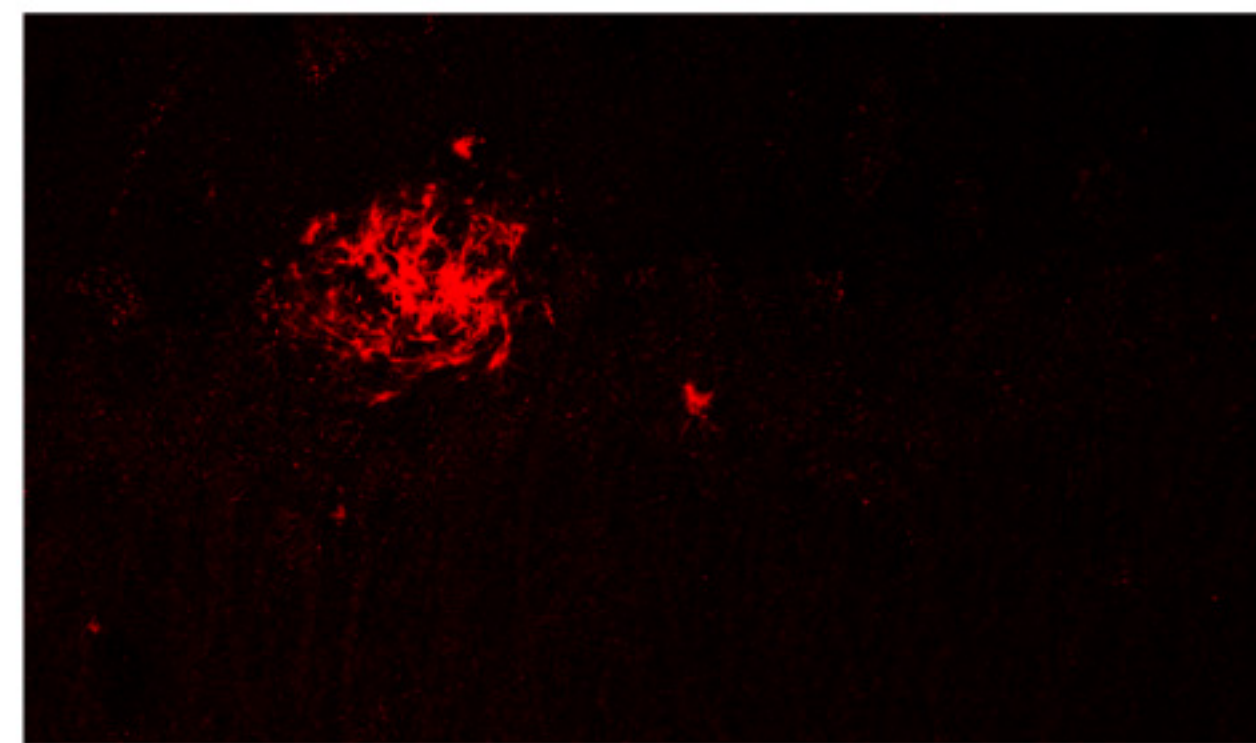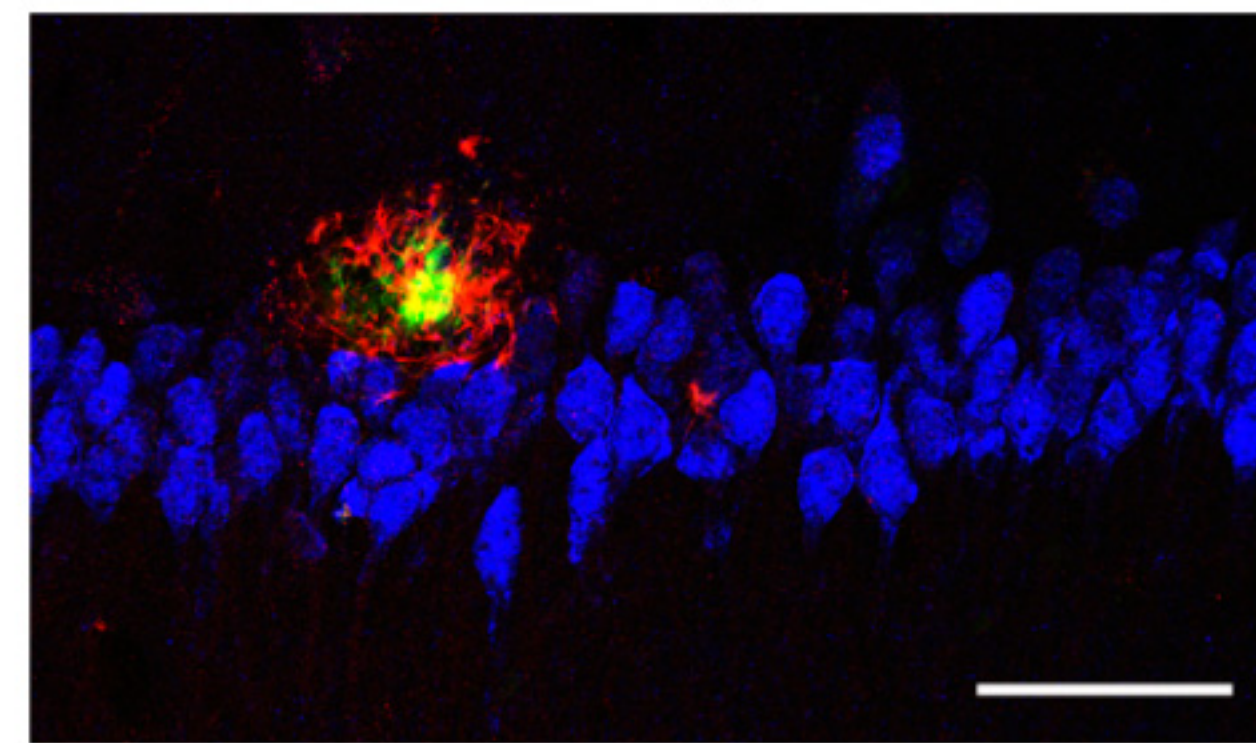

Wt

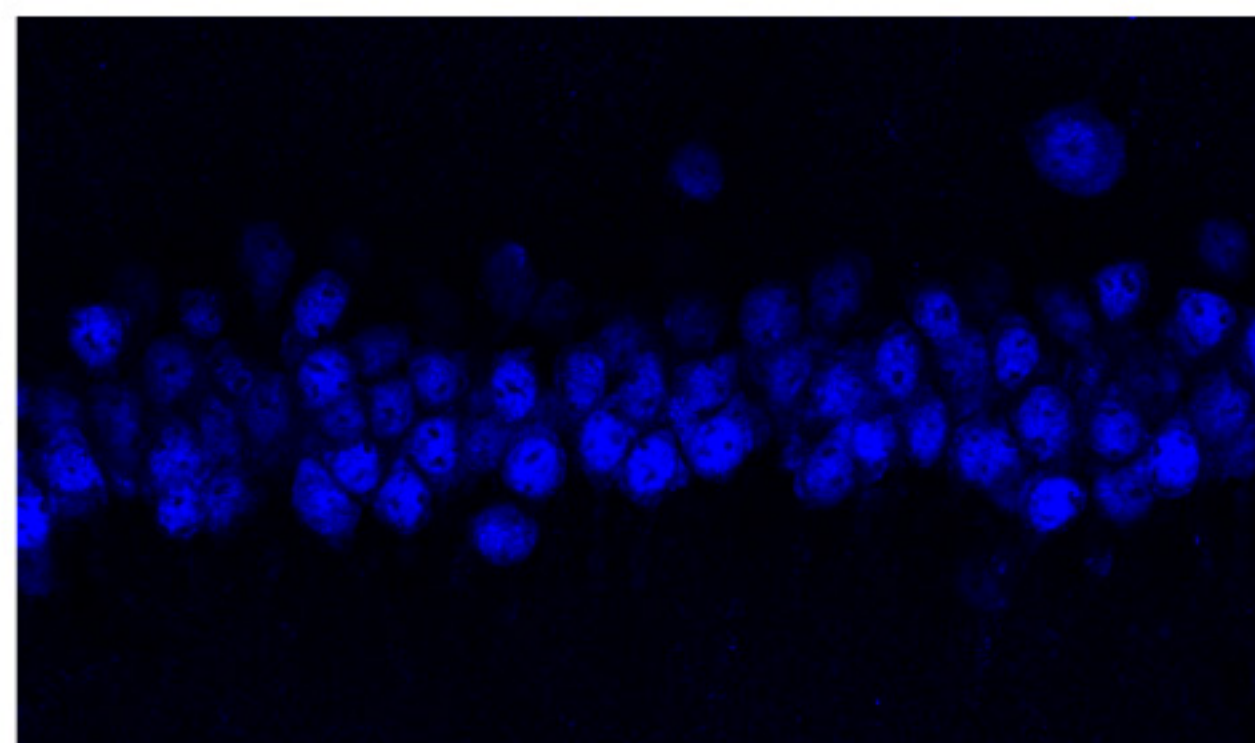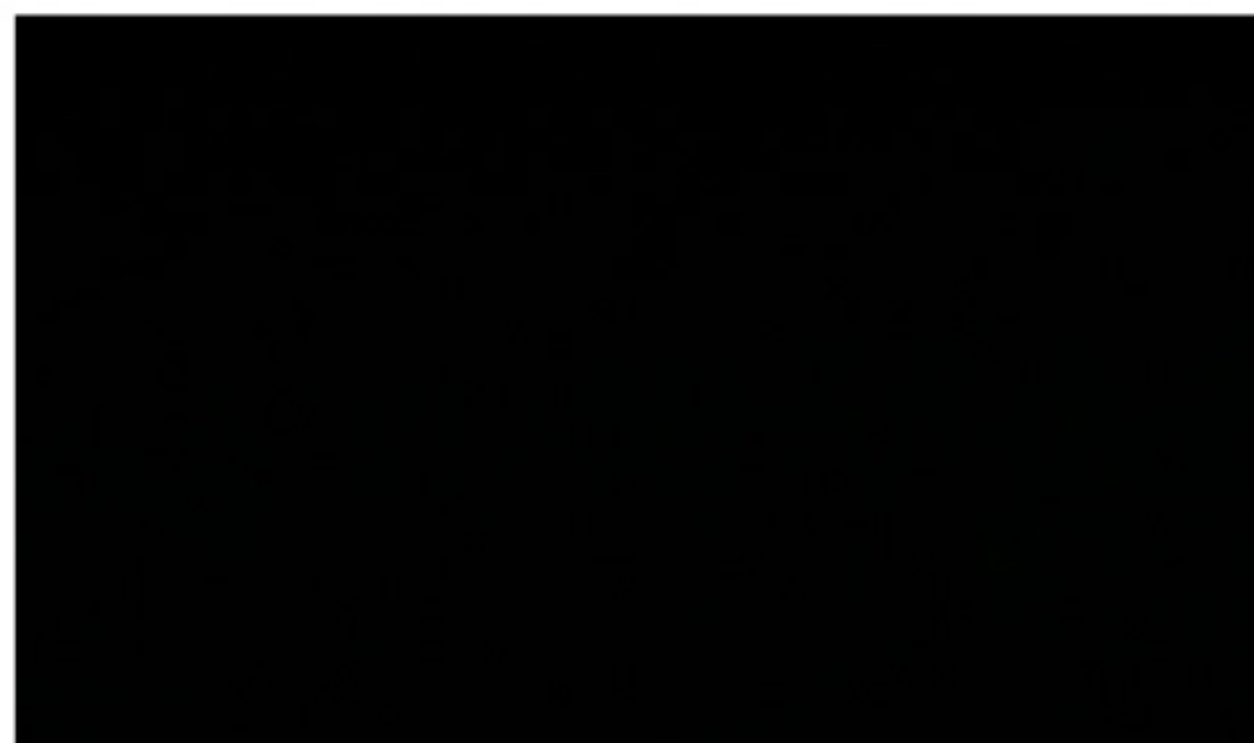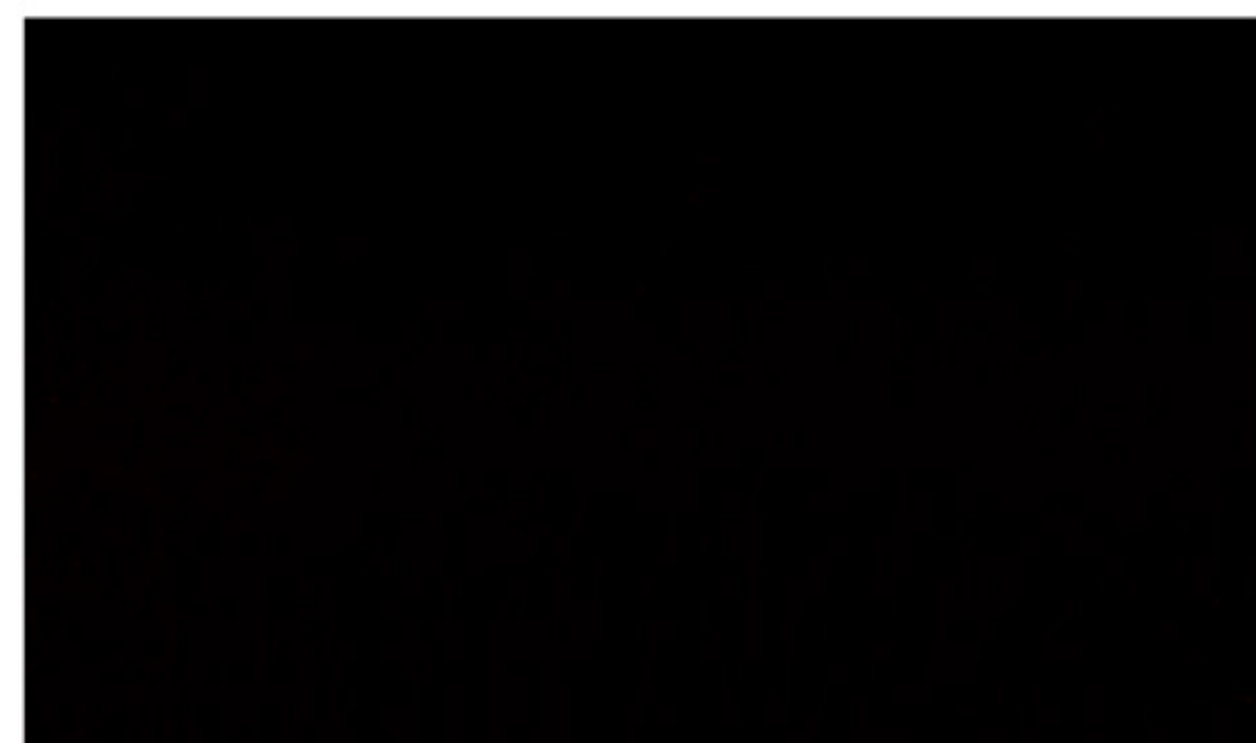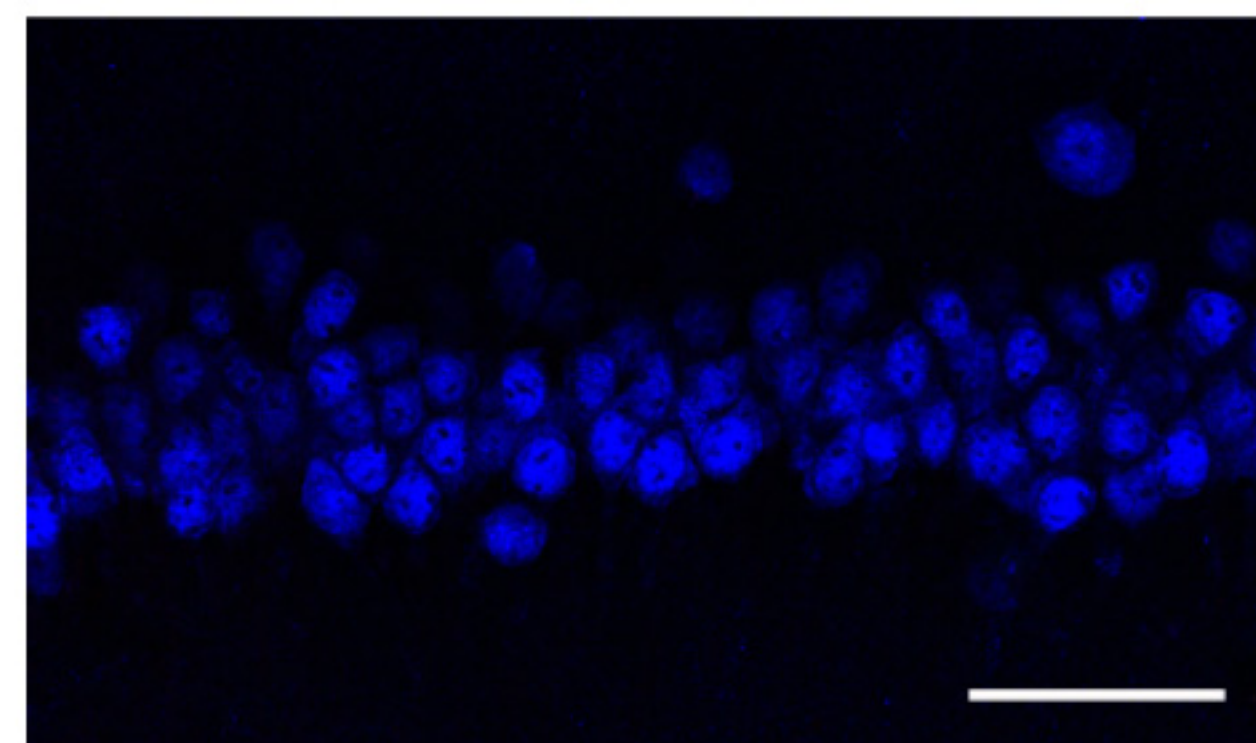

Supplement: mmc7.pdf [file mmc7.pdf]

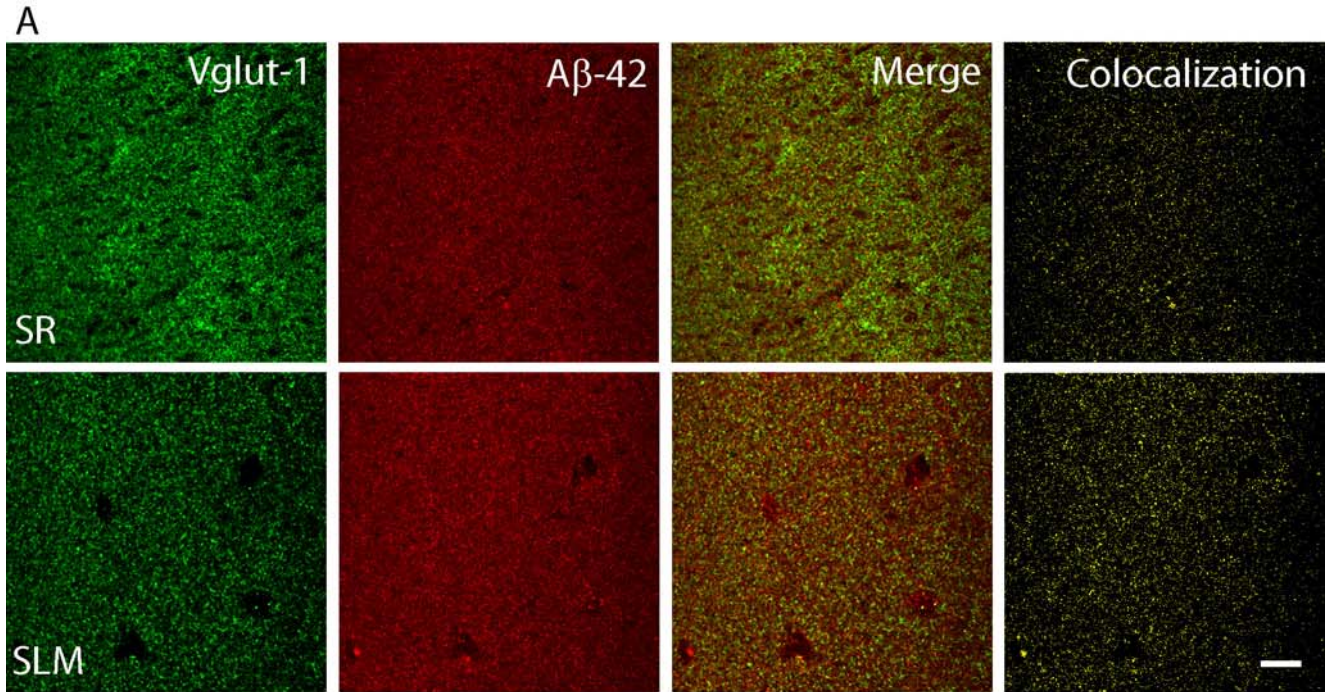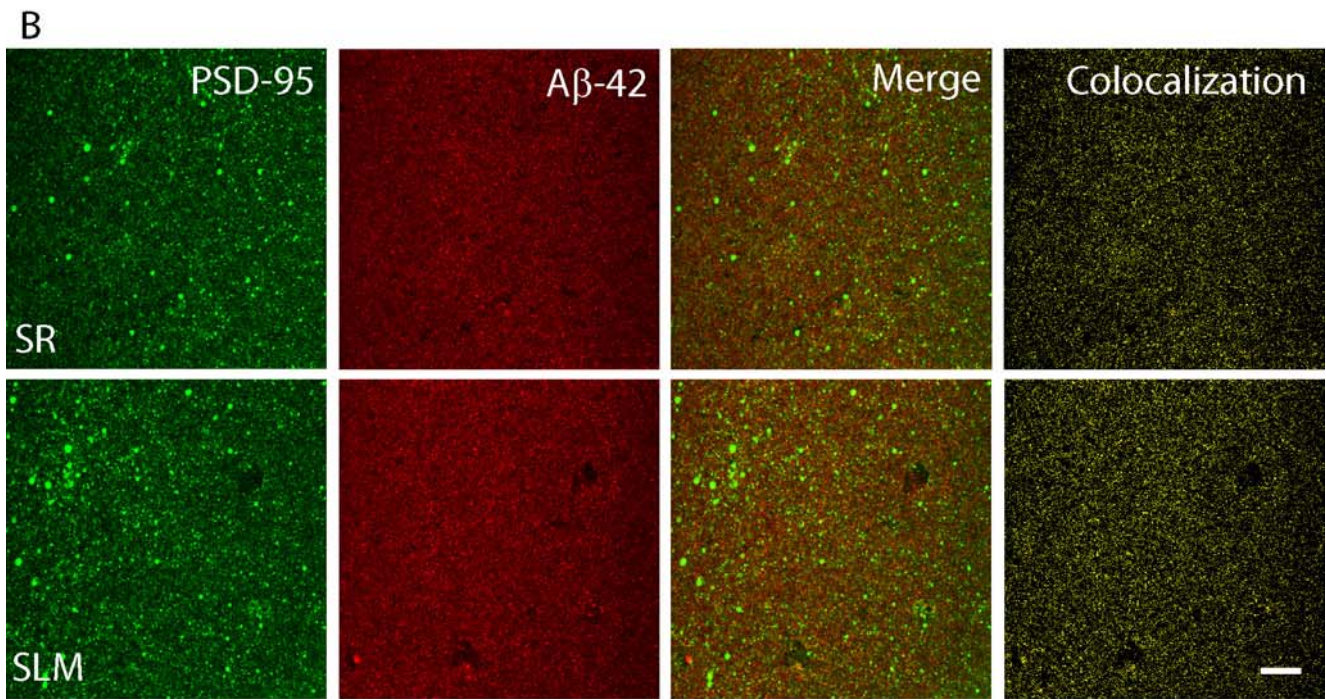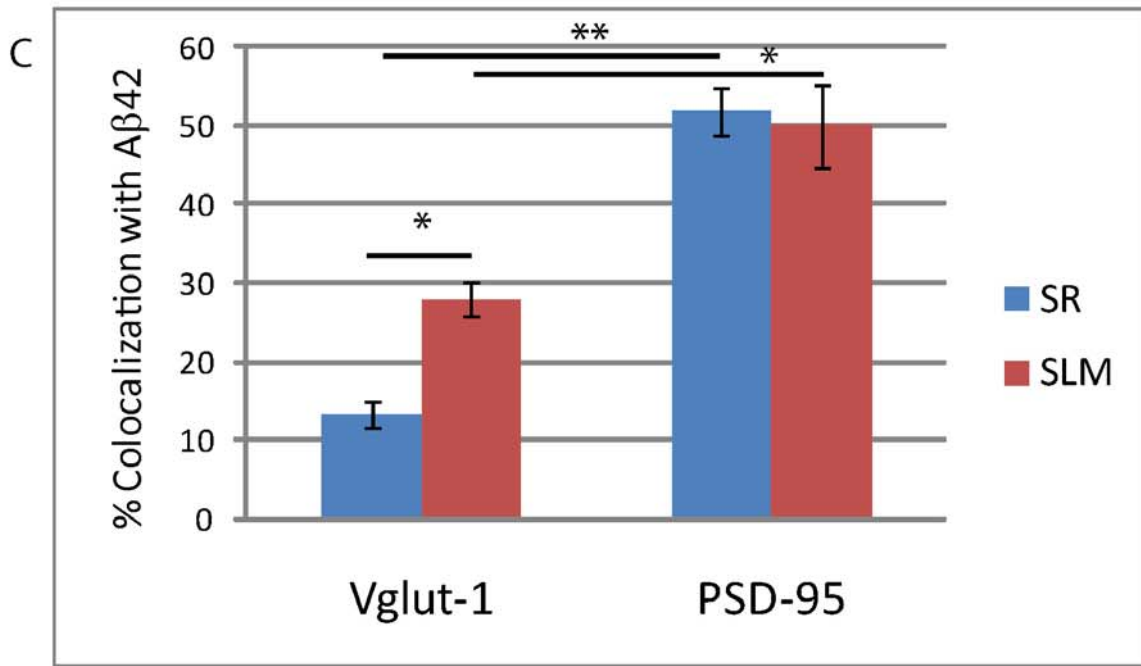

Supplement: mmc8.pdf [file mmc8.pdf]
